# Supplementary material
Source: PubMed Central journal article supplement (PMC4310637)
Supplement: nn505306h_si_001.pdf [file nn505306h_si_001.pdf]

# Supporting Information

## Sprayable Elastic Conductors Based on Block Copolymer Silver Nanoparticle Composites

**Mert Vural,<sup>†,§</sup> Adam M. Behrens,<sup>‡,§</sup> Omar B. Ayyub,<sup>‡</sup> Joseph J. Ayoub,<sup>†</sup> and Peter Kofinas<sup>‡,\*</sup>**

<sup>†</sup>Department of Materials Science and Engineering, University of Maryland, College Park, MD 20742, USA.

<sup>‡</sup>Fischell Department of Bioengineering, University of Maryland, College Park, MD 20742, USA.

<sup>§</sup> These authors contributed equally to this work

\*Address correspondence to [kofinas@umd.edu](mailto:kofinas@umd.edu)

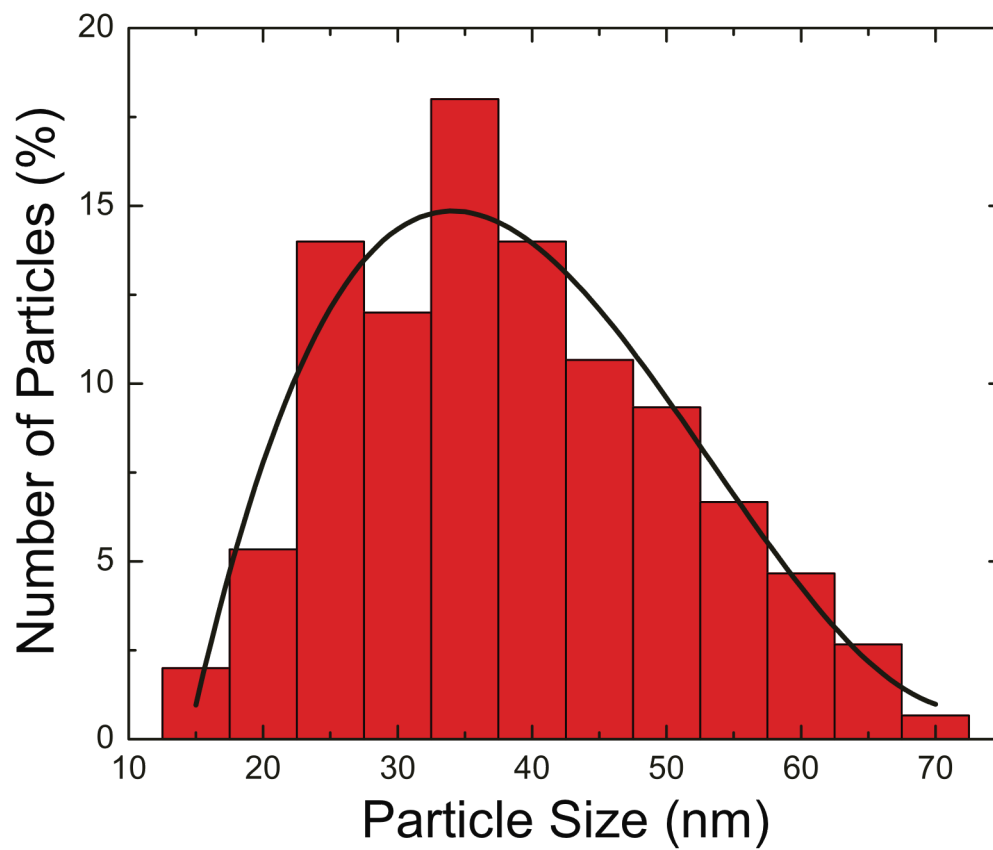

**Figure S1. Nanoparticle size distribution as measured by TEM (n=150).**

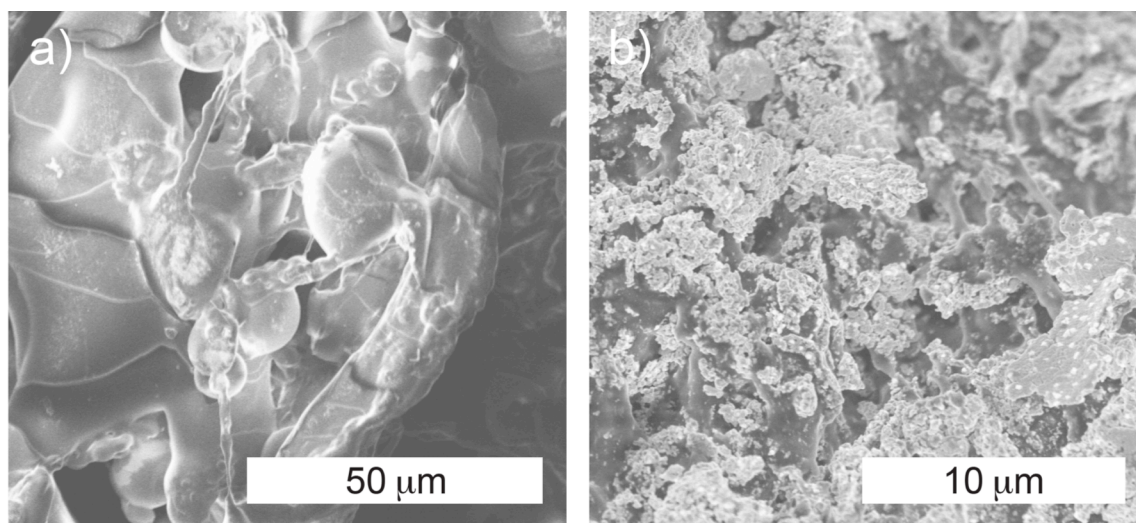

**Figure S2. Fiber structure was irreversibly lost during the fabrication process for SIS block copolymers with a styrene weight percentage lower than 22%. a) SEM image of solution blow spun polymer network of low styrene content SIS (14 wt% styrene) after being swollen with 25% (wt/vol) STFA solution, showing loss of fiber morphology. b) SEM image of the same polymer network after silver nanoparticle nucleation.**

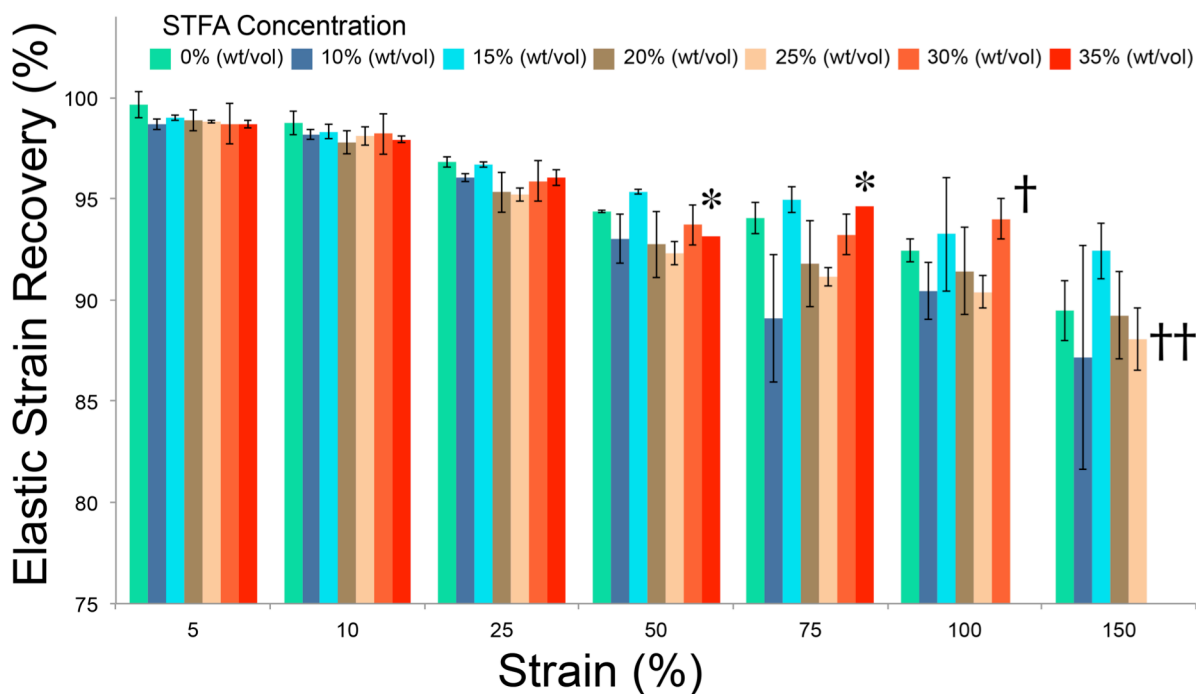

**Figure S3. Elastic recovery of SIS fiber mats and stretchable conductors fabricated from different precursor concentrations after consecutive strain cycling to increasing maximum strain values. (\*) Indicates that 2 of 3 samples failed during that strain cycle for a specific experimental group. (†) Indicates that all of the samples have failed. (n=3) for all groups, error bars represent standard deviation.**

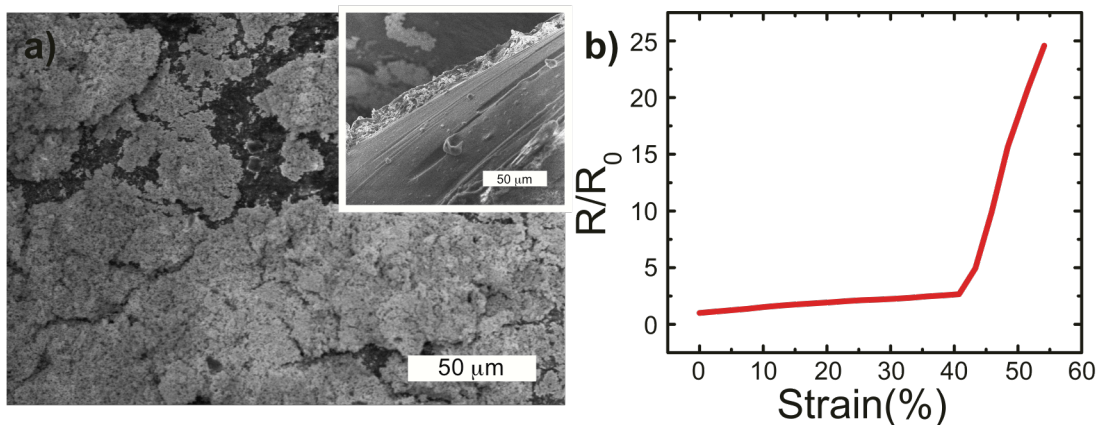

**Figure S4. a) SEM image of a drop cast SIS film nucleated with 25% (wt/vol) STFA solution (SEM image of cross section-inset). Silver nanoparticles were only formed on the outer surface of the film in a similar manner to individual SIS fibers. b) Normalized resistance values versus strain for polymer film silver nanoparticle composites. Resistance values increase by 25 fold at 50% strain and subsequently fail, showing the importance of the influence of fiber structure on electromechanical properties.**

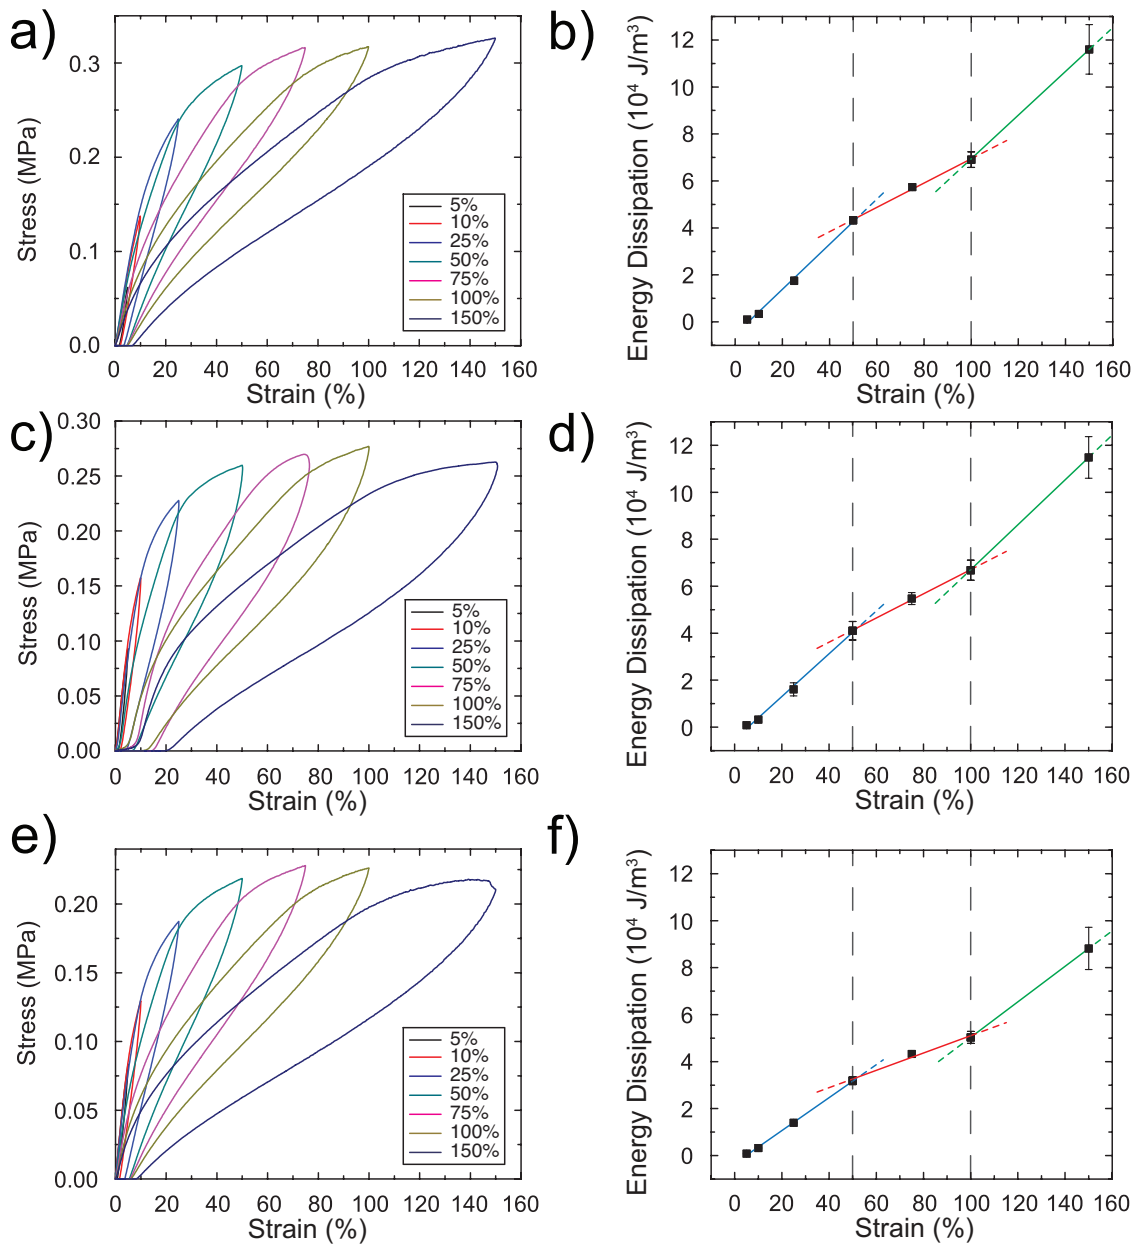

**Figure S5. a,c,e) Stress/strain cycling curves and b,d,f) energy dissipation values and corresponding linear fits for stretchable conductors fabricated with 10%, 15%, and 20% (wt/vol) STFA solution, respectively (n=3). Error bars represent standard deviation. Linear correlations relating energy dissipation to strain describe different regions of strain induced structural changes (blue, red, and green lines).**

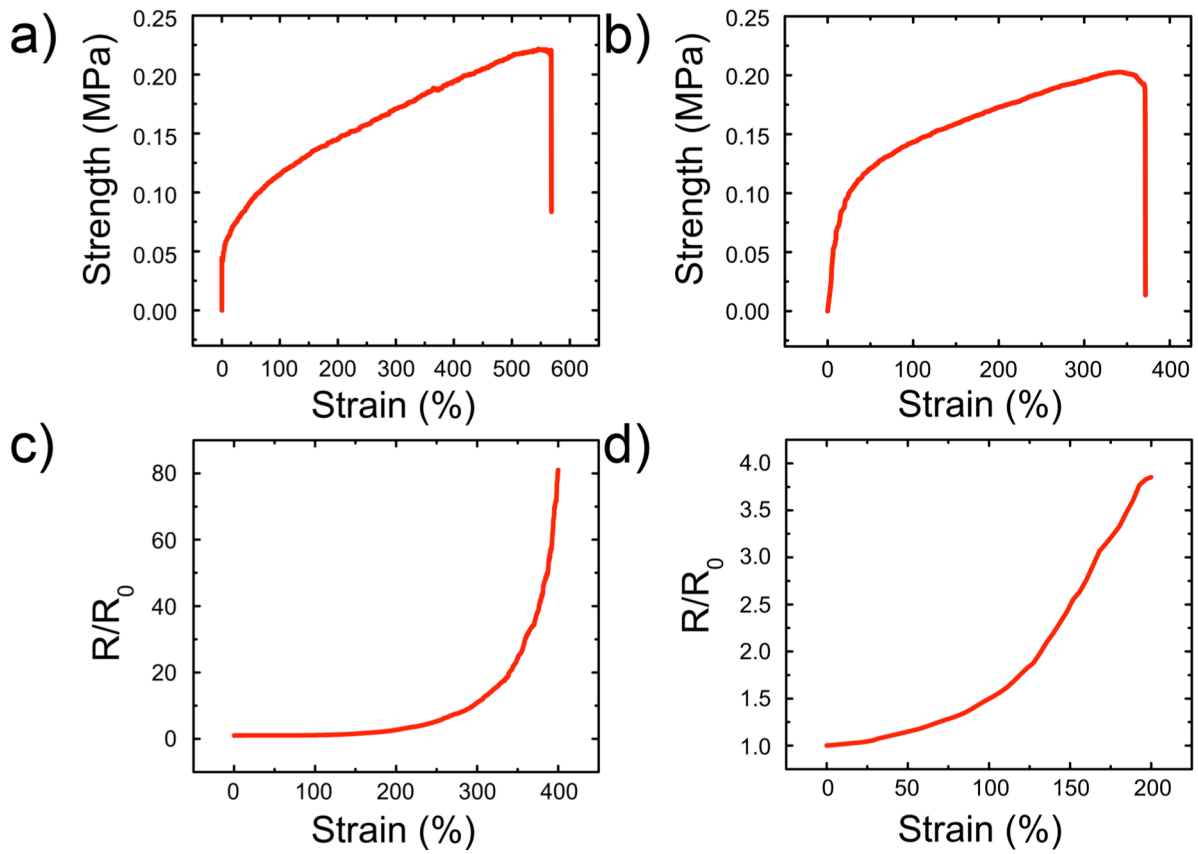

**Figure S6. Stress/strain curves for a) elastomeric fiber mats, b) conductive composites fabricated with 25% (wt/vol) solutions. Normalized resistance values of c) bulk and d) line patterns of conductive composites fabricated with 25% (wt/vol) STFA solutions. The bulk conductors failed between 370% and 400% strain, remaining conductive until mechanical failure.**
